# Supplementary material
Source: Royal Society of Chemistry journal article supplement (doi:10.1039/d6cc00890a)
Supplement: d6cc00890a1.pdf [file d6cc00890a1.pdf]

## Supplementary Information

### **10.21% Efficiency $\text{Sb}_2(\text{S,Se})_3$ Thin Film Solar Cells with a Mixed Hole-Transport Materials**

Aoxing Liu,<sup>a</sup> Pengwei Fang,<sup>a</sup> Rongfeng Tang,<sup>a</sup> Pingwu Du,<sup>\*a</sup> Tao Chen,<sup>\*a</sup>

<sup>a</sup>Department of Materials Science and Engineering, School of Chemistry and Materials Science, Hefei National Research Center for Physical Sciences at the Microscale, University of Science and Technology of China, Hefei, Anhui 230026, P. R. China.

\* Corresponding author: [dupingwu@ustc.edu.cn](mailto:dupingwu@ustc.edu.cn) (Pingwu Du), [tchenmse@ustc.edu.cn](mailto:tchenmse@ustc.edu.cn) (Tao Chen)

**Device Fabrication.** In the solar cell fabrication, CdS was used as the electron transport layer, which was deposited by CBD method. The specific deposition process is as follows: Typically, 165 mL DI water, 23 mL of CdSO<sub>4</sub> (15 mmol L<sup>-1</sup>) solution, 30 mL of aqueous ammonia solution, and 13 mL of thiourea (1.5 mol L<sup>-1</sup>) solution were stirred for 3 minutes in a beaker. Then, FTO substrates were placed in the beaker and heated at 66 °C in a water-bath. After 16 min, the CdS film were taken out and rinsed with DI water. Finally, 15 mg mL<sup>-1</sup> of CdCl<sub>2</sub> solution was spin-coated onto the CdS film and annealed at 400 °C in air for 10 min.

For Sb<sub>2</sub>(S,Se)<sub>3</sub> films, they were prepared via hydrothermal deposition method, with sodium thiosulfate pentahydrate (Na<sub>2</sub>S<sub>2</sub>O<sub>3</sub>·5H<sub>2</sub>O), sodium selenosulfate (Na<sub>2</sub>SeSO<sub>3</sub>), potassium antimonyl tartrate (KSbC<sub>4</sub>H<sub>4</sub>O<sub>7</sub>·3H<sub>2</sub>O) as S, Se, and Sb sources. The Na<sub>2</sub>SeSO<sub>3</sub> solution was prepared by a hydrothermal method, which involved reacting 0.16 g of selenium powder with 1.01 g of sodium sulfite (Na<sub>2</sub>SO<sub>3</sub>) in 40 mL of deionized water at 110°C for 360 minutes. The mixture of selenium powder and sodium sulfite must be thoroughly stirred prior to the reaction to prevent incomplete conversion. For the Sb<sub>2</sub>(S,Se)<sub>3</sub> precursor solution, 1.63 g of KSbC<sub>4</sub>H<sub>4</sub>O<sub>7</sub>·3H<sub>2</sub>O was dissolved in 120 mL of deionized water at 25°C under stirring for 3 minutes. Subsequently, 4.76 g of Na<sub>2</sub>S<sub>2</sub>O<sub>3</sub>·5H<sub>2</sub>O was added and stirred for 1 minute until complete dissolution. Then, 16.5 mL of the Na<sub>2</sub>SeSO<sub>3</sub> solution was introduced and stirred for 30 seconds, yielding a light-yellow turbid precursor solution. Hydrothermal synthesis was conducted at 135°C, with an optimal deposition window of 110 to 130 minutes. Finally, the Sb<sub>2</sub>(S,Se)<sub>3</sub> film was taken out, dried, and annealed on hotplate at 350°C in a N<sub>2</sub>-filled glove box.

The hole-transport layers were prepared by spin coating the precursor solutions of Spiro-OMeTAD and HPB-OMeDPA. For Spiro-OMeTAD solution, it was prepared by adding 36.6 mg of Spiro-OMeTAD (99.8%, Yingkou Youxuan Trading Co., Ltd.), 14.5 μL of tBP (96%, J&K), and 9.5 μL of a lithium bis(trifluoromethanesulfonyl)imide (Li-TFSI, 98%, J&K) acetonitrile solution (520 mg mL<sup>-1</sup>) to 1 mL chlorobenzene. The Spiro-OMeTAD solution was then spin-coated onto the Sb<sub>2</sub>(S,Se)<sub>3</sub> surface at 3000 rpm for 30 seconds. Subsequently, the unfinished

device was placed on a hotplate and annealed at 100 °C for 10 minutes. For the preparation of the HPB-OMeDPA solution, 29.76 mg of HPB-OMeDPA (prepared according to the reported method)<sup>17</sup> was used in place of 36.6 mg of Spiro-OMeTAD. The mixed hole-transport material was fabricated by combining Spiro-OMeTAD and HPB-OMeDPA at a molar ratio of 1:1. In both cases, all other reagents and procedural steps were maintained consistent with the standard Spiro-OMeTAD preparation process. Final, the Au (70 nm) film was used as a metal electrode for thermal evaporation with an aperture area of 0.105 cm<sup>2</sup>.

**Measurement and Characterization.** The scanning electron microscopy (SEM) images of HTMs were visualized by cold-field emission scanning electron microscopy (SU8200). The X-ray photoelectron spectroscopy (XPS) of HTMs was in progress on Thermo Scientific K-Alpha+. The energy band positions of Spiro-OMeTAD and HPB-OMeDPA thin film were tested via ultraviolet photoelectron spectroscopy (UPS) (Thermo Fisher, ESCALAB 250Xi) with a bias of -5 V. The ultraviolet-visible absorption spectra of Spiro-OMeTAD and HPB-OMeDPA films were collected using a UV-Visible spectrophotometer (UV-Vis DRS, SOLID 3700) in the 300-900 nm range. The surface morphologies of Sb<sub>2</sub>(S,Se)<sub>3</sub>/Spiro-OMeTAD and Sb<sub>2</sub>(S,Se)<sub>3</sub>/HPB-OMeDPA films were collected by atomic force microscopy (AFM, Bruker). The ultrafast transient absorption (TA) of the Spiro-OMeTAD and HPB-OMeDPA films was carried on a pump-probe system (Helios, Ultrafast System LLC). A Keithley 2400 apparatus was used to measure the *J-V* characteristics under solar-simulated AM 1.5 sunlight (100 mW cm<sup>-2</sup>) with a standard xenon-lamp-based solar simulator (Oriel Sol 3 A, Japan).

## Supplementary Figures

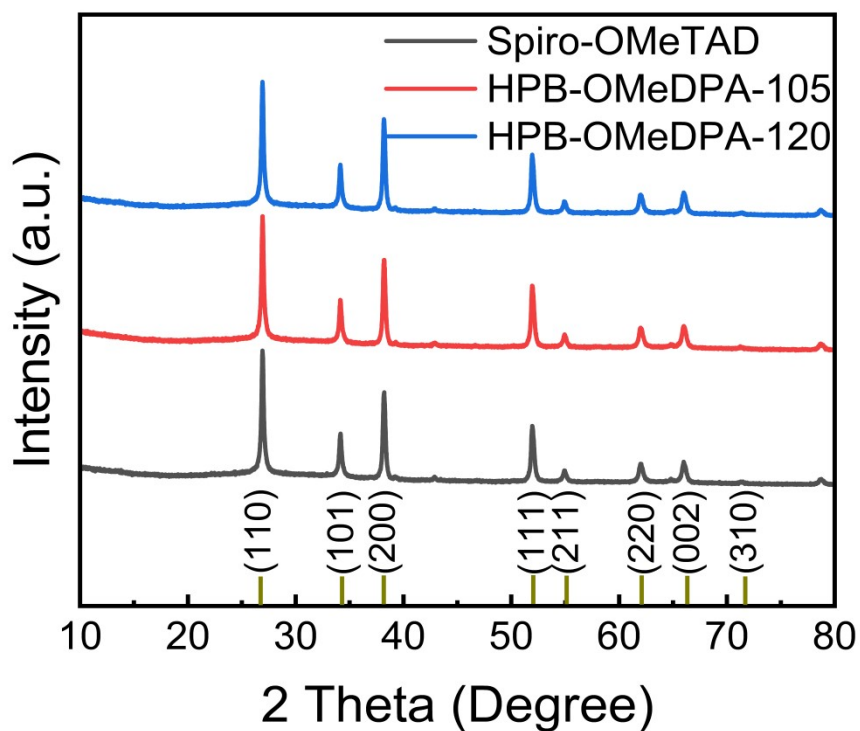

**Figure S1.** XRD test of the thin film annealed for the FTO/Spiro-OMeTAD device at 105 °C; XRD test of the thin film annealed for the FTO/HPB-OMeDPA device at 105 °C and 120 °C. All of the XRD patterns show diffraction peaks from FTO substrates, indicating there is no new crystalline phase from the HTMs.

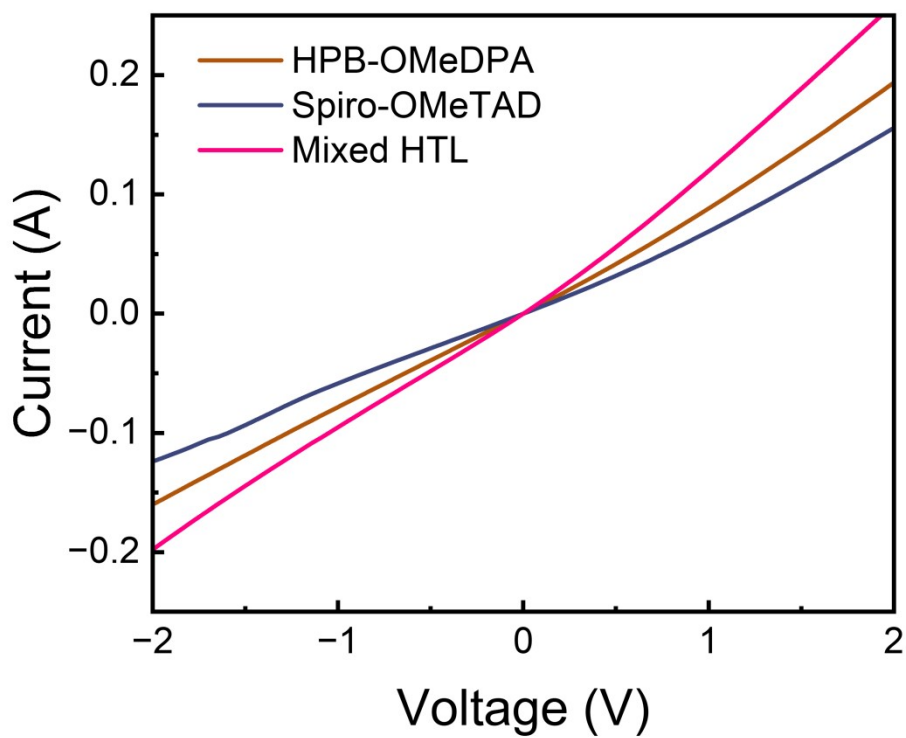

**Figure S2.** the conductivity of hole-transport materials based on the FTO/CdS/Sb<sub>2</sub>(S,Se)<sub>3</sub>/HTL/Au device model through J-V testing.

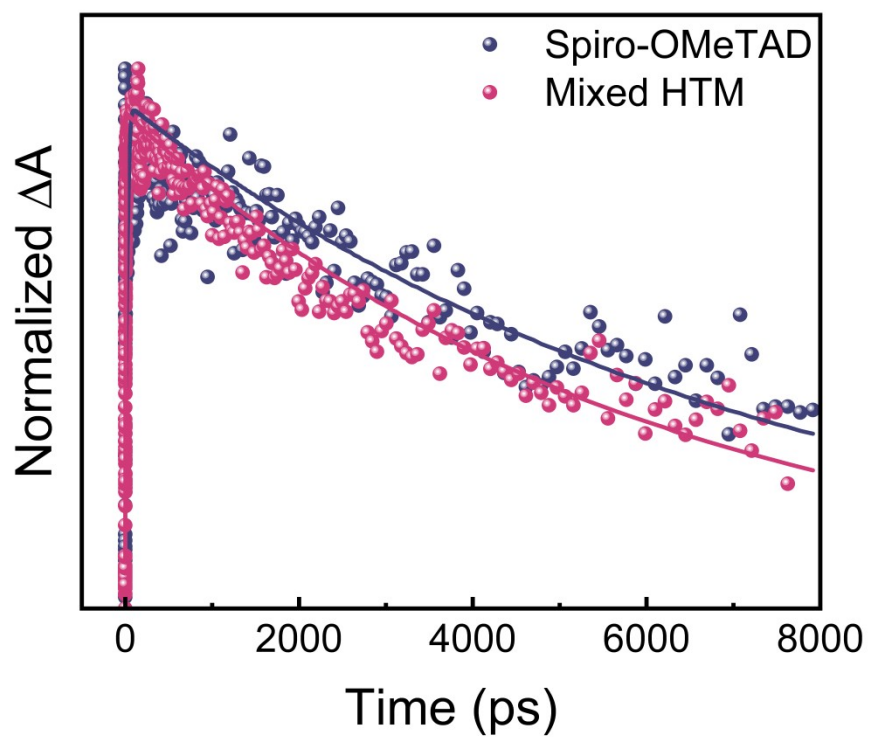

**Figure S3.** TAS decay kinetics at 629 nm of Spiro-OMeTAD and HPB-OMeDPA film.

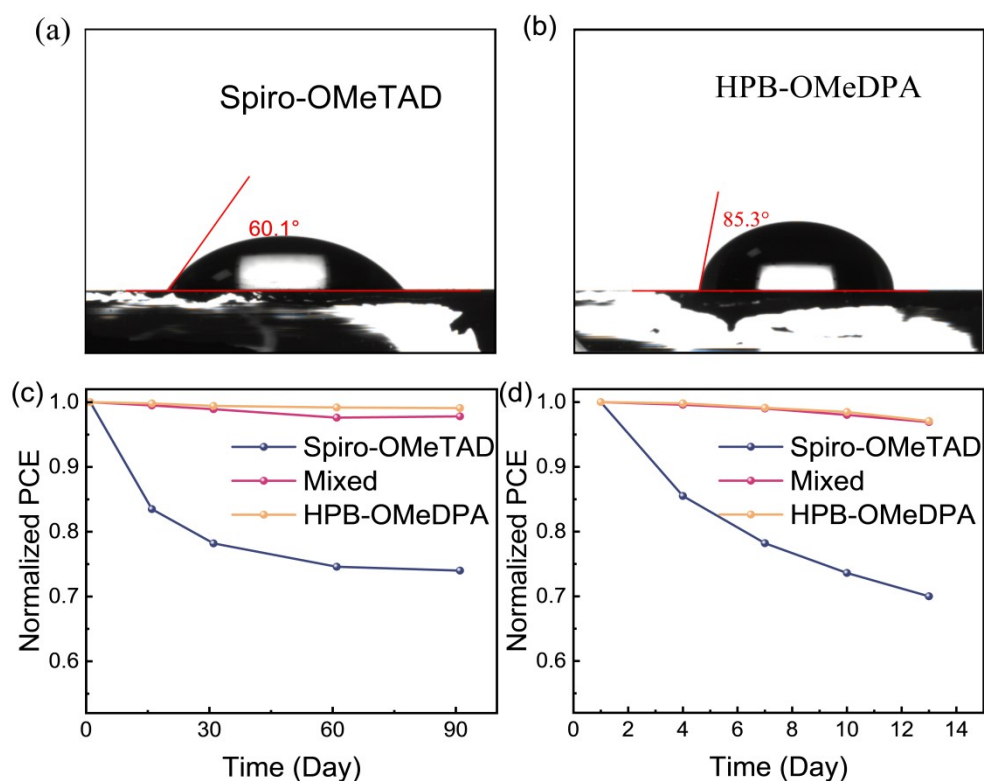

**Figure S4.** Contact angle measurements by dropping water on top of (a) Spiro-OMeTAD, (b) HPB-OMeDPA films. Stability of unencapsulated  $\text{Sb}_2(\text{S,Se})_3$  solar cells with different HTMs (Spiro-OMeTAD, HPB-OMeDPA, and mixed HTM). (c) Long-term stability under ambient conditions (room temperature, 15–50% RH) for 90 days. (d) Thermal stability at 50 °C for 14 days.
